# Supplementary material for: Alkali metal ion assisted synthesis of faceted anatase TiO2
Source: Royal Society of Chemistry journal article supplement (doi:10.1039/c3ce26965e), 2013-01-01
Supplement: c3ce26965e.pdf [file c3ce26965e.pdf]

Cite this: DOI: 10.1039/c0xx00000x

www.rsc.org/xxxxxx

ARTICLE TYPE

## Alkali Metal Ion Assisted Synthesis of Faceted Anatase TiO<sub>2</sub>

Min-Han Yang,<sup>a</sup> Po-Chin Chen,<sup>a</sup> Min-Chiao Tsai,<sup>a</sup> Ting-Ting Chen,<sup>a</sup> I-Chun Chang,<sup>a</sup> Hsin-Tien Chiu<sup>b</sup>  
and Chi-Young Lee<sup>\*a</sup>

Received (in XXX, XXX) Xth XXXXXXXXXX 20XX, Accepted Xth XXXXXXXXXX 20XX

DOI: 10.1039/b000000x

### Supporting Information

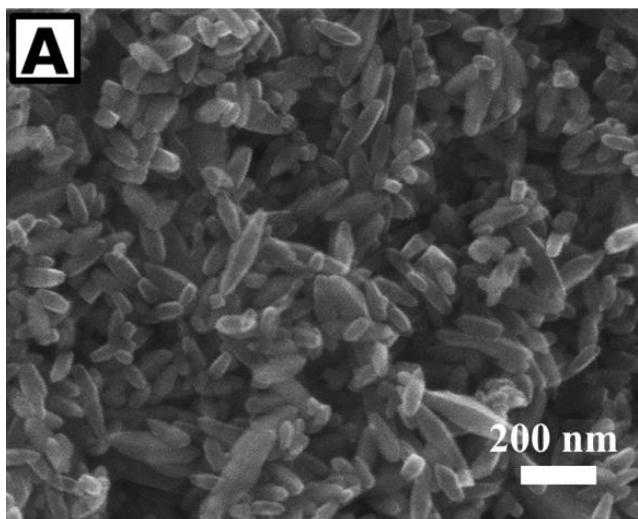

Fig. S1 FESEM images of spindle-shaped TiO<sub>2</sub> obtained in hydrothermal process in D. I. water.

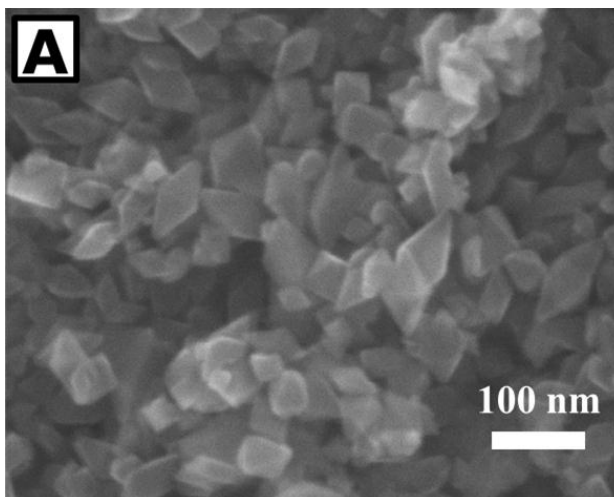

Fig. S2 FESEM images of bipyramidal TiO<sub>2</sub> obtained in hydrothermal process in mixed solution of 0.075 M LiCl and 0.25 M KCl.

10

Cite this: DOI: 10.1039/c0xx00000x

www.rsc.org/xxxxxxx

ARTICLE TYPE

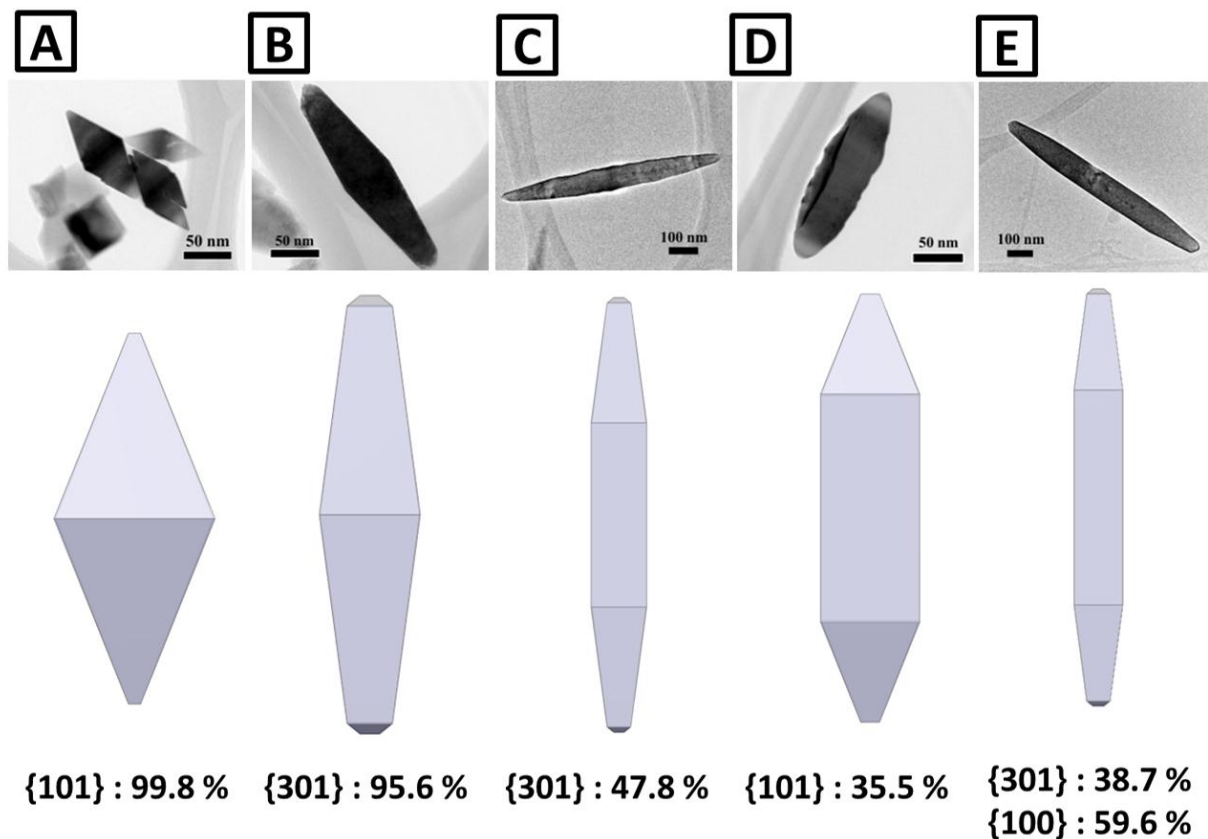

**Scheme S1** The geometric characterization of the TiO<sub>2</sub> exposed face percentage (A) B-TiO<sub>2</sub> (B) S-TiO<sub>2</sub> (C) N1-TiO<sub>2</sub> (D) O-TiO<sub>2</sub> (E) N2-TiO<sub>2</sub>

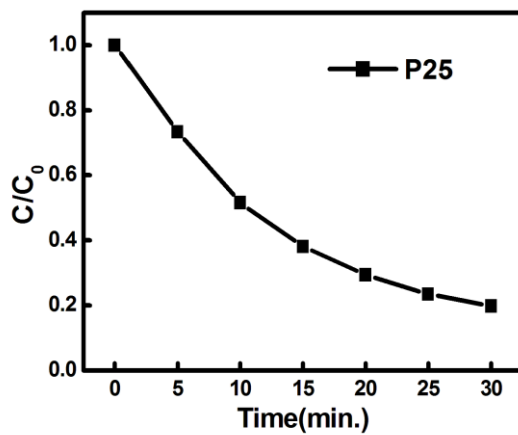

**Fig. S3** Photocatalytic performance of commercial P25 and its photodegradation rate constant ( $k = 0.055 \text{ min}^{-1}$ )
